# Supplementary material for: Dynamic Regulation of Transporter Expression to Increase L-Threonine Production Using L-Threonine Biosensors
Source: MDPI journal article supplement (doi:10.3390/fermentation8060250), 2022-05-26
Supplement: s1 [file s1]

## Supplementary material

**Table S1.** Plasmids used in this study.

| Plasmids               | Description                                                                                                                               | Source     |
|------------------------|-------------------------------------------------------------------------------------------------------------------------------------------|------------|
| pCL1920                | rep <sub>pSC101</sub> Spc <sup>R</sup> P <sub>lac</sub>                                                                                   | [1]        |
| cl- <i>rhtA</i>        | rep <sub>pSC101</sub> Spc <sup>R</sup> P <sub>lac-lacO-rhtA-terminator</sub> BBa_B1006- P <sub>lac-lacO-rfp</sub>                         | This study |
| P <sub>cysJ-rfp</sub>  | rep <sub>pSC101</sub> Spc <sup>R</sup> P <sub>cysJ</sub> B0034- <i>rfp</i>                                                                | This study |
| P <sub>cysD-rfp</sub>  | rep <sub>pSC101</sub> Spc <sup>R</sup> P <sub>cysD</sub> B0034- <i>rfp</i>                                                                | This study |
| P <sub>cysJH-rfp</sub> | rep <sub>pSC101</sub> Spc <sup>R</sup> P <sub>cysJH</sub> B0034- <i>rfp</i>                                                               | This study |
| cl-JAR                 | rep <sub>pSC101</sub> Spc <sup>R</sup> P <sub>cysJ</sub> B0034- <i>rhtA-terminator</i> BBa_B1006- P <sub>cysJ</sub> B0034- <i>rfp</i>     | This study |
| cl-DAR                 | rep <sub>pSC101</sub> Spc <sup>R</sup> P <sub>cysD</sub> B0034- <i>rhtA-terminator</i> BBa_B1006- P <sub>cysD</sub> B0034- <i>rfp</i>     | This study |
| cl-JHAR                | rep <sub>pSC101</sub> Spc <sup>R</sup> P <sub>cysJH</sub> B0034- <i>rhtA-terminator</i> BBa_B1006- P <sub>cysJH</sub> B0034- <i>rfp</i>   | This study |
| cl-100AR               | rep <sub>pSC101</sub> Spc <sup>R</sup> P <sub>J23100</sub> B0034- <i>rhtA-terminator</i> BBa_B1006- P <sub>J23100</sub> B0034- <i>rfp</i> | This study |
| cl-101AR               | rep <sub>pSC101</sub> Spc <sup>R</sup> P <sub>J23101</sub> B0034- <i>rhtA-terminator</i> BBa_B1006- P <sub>J23101</sub> B0034- <i>rfp</i> | This study |
| cl-109AR               | rep <sub>pSC101</sub> Spc <sup>R</sup> P <sub>J23109</sub> B0034- <i>rhtA-terminator</i> BBa_B1006- P <sub>J23109</sub> B0034- <i>rfp</i> | This study |
| cl-105AR               | rep <sub>pSC101</sub> Spc <sup>R</sup> P <sub>J23105</sub> B0034- <i>rhtA-terminator</i> BBa_B1006- P <sub>J23105</sub> B0034- <i>rfp</i> | This study |
| cl-110AR               | rep <sub>pSC101</sub> Spc <sup>R</sup> P <sub>J23110</sub> B0034- <i>rhtA-terminator</i> BBa_B1006- P <sub>J23110</sub> B0034- <i>rfp</i> | This study |
| cl-116AR               | rep <sub>pSC101</sub> Spc <sup>R</sup> P <sub>J23116</sub> B0034- <i>rhtA-terminator</i> BBa_B1006- P <sub>J23116</sub> B0034- <i>rfp</i> | This study |
| cl-JB                  | rep <sub>pSC101</sub> Spc <sup>R</sup> P <sub>cysJ</sub> B0034- <i>rhtB</i>                                                               | This study |
| cl-JC                  | rep <sub>pSC101</sub> Spc <sup>R</sup> P <sub>cysJ</sub> B0034- <i>rhtC</i>                                                               | This study |

**Table S2.** Strains used in this study.

| Strains                     | Description                                                                                                   | Source       |
|-----------------------------|---------------------------------------------------------------------------------------------------------------|--------------|
| <i>E. coli</i> DH5 $\alpha$ | F- supE44 $\Delta$ lacU169 ( $\phi$ 80 <i>lacZ</i> $\Delta$ M15) <i>hsdR17 recA1 endA1 gyrA96 thi-1 relA1</i> | Invitrogen   |
| <i>E. coli</i> K-12 MG1655  | K12 F- <i>lambda- ilvG- rfb-50 rph-1</i>                                                                      | Invitrogen   |
| Tm                          | L-threonine production host cell                                                                              | FuFeng Group |
| Tm-cl                       | Tm carrying pCL1920                                                                                           | This study   |
| Tm-AR                       | Tm carrying <i>cl-rhtA</i>                                                                                    | This study   |
| MG-cl                       | <i>E. coli</i> K-12 MG1655 carrying pCL1920                                                                   | This study   |
| MG-P <sub>cysJ</sub>        | <i>E. coli</i> K-12 MG1655 carrying <i>cl-J</i>                                                               | This study   |
| MG-P <sub>cysD</sub>        | <i>E. coli</i> K-12 MG1655 carrying <i>cl-D</i>                                                               | This study   |
| MG-P <sub>cysJH</sub>       | <i>E. coli</i> K-12 MG1655 carrying <i>cl-JH</i>                                                              | This study   |
| Tm-P <sub>cysJ</sub>        | Tm carrying <i>cl-J</i>                                                                                       | This study   |
| Tm-P <sub>cysD</sub>        | Tm carrying <i>cl-D</i>                                                                                       | This study   |
| Tm-P <sub>cysJH</sub>       | Tm carrying <i>cl-JH</i>                                                                                      | This study   |
| Tm-JAR                      | Tm carrying <i>cl-JAR</i>                                                                                     | This study   |
| Tm-DAR                      | Tm carrying <i>cl-DAR</i>                                                                                     | This study   |
| Tm-JHAR                     | Tm carrying <i>cl-JHAR</i>                                                                                    | This study   |
| Tm-100AR                    | Tm carrying <i>cl-100AR</i>                                                                                   | This study   |
| Tm-101AR                    | Tm carrying <i>cl-101AR</i>                                                                                   | This study   |
| Tm-109AR                    | Tm carrying <i>cl-109AR</i>                                                                                   | This study   |
| Tm-105AR                    | Tm carrying <i>cl-105AR</i>                                                                                   | This study   |
| Tm-110AR                    | Tm carrying <i>cl-110AR</i>                                                                                   | This study   |
| Tm-116AR                    | Tm carrying <i>cl-116AR</i>                                                                                   | This study   |
| Tm-JB                       | Tm carrying <i>cl-JB</i>                                                                                      | This study   |
| Tm-JC                       | Tm carrying <i>cl-JC</i>                                                                                      | This study   |

**Table S3.** Primers used in this study.

| Primer name                           | Sequences (5'-3')                                                             |
|---------------------------------------|-------------------------------------------------------------------------------|
| cl- <i>rhtA</i> reconstruction        |                                                                               |
| cl-F1                                 | agcaaaataaaagaattagacattaattaaagcttgcatgcctgcaggt                             |
| cl-R1                                 | gaccggcattttacgtaatgaaccaggcattggcgtaatcatggtcatact                           |
| cl- <i>rhtA</i> -F                    | atgcctgggttcattacgtaaaatgc                                                    |
| cl- <i>rhtA</i> -R                    | gcaagctttaattaatgtctaattc                                                     |
| P <sub>cysJ-rfp</sub> reconstruction  |                                                                               |
| cl-F2                                 | agcttgcatgcctgcaggt                                                           |
| cl-R2                                 | gcctgggggtgcctaatgagtga                                                       |
| cysJ-F                                | gagttagctcactcattaggcaccagcggtgcgcaaaatcgctgatt                               |
| cysJ-R                                | ctagtatttctccttttcttagagtaagcaaagctgtttctgcg                                  |
| RFP-F1                                | tctagagaaaggagagaaatactagatggcttctccgaagacgt                                  |
| RFP-R1                                | ctctagagtcgacctgcaggcatgcaagctttaagcgtagtttctgcgtttgc                         |
| P <sub>cysD-rfp</sub> reconstruction  |                                                                               |
| cl-F2                                 | agcttgcatgcctgcaggt                                                           |
| cl-R2                                 | gcctgggggtgcctaatgagtga                                                       |
| cysD-F                                | gagttagctcactcattaggcaccagcggtgccttaagcactttttg                               |
| cysD-R                                | ctagtatttctccttttcttagaatgtttcgactataggagcgt                                  |
| RFP-F1                                | tctagagaaaggagagaaatactagatggcttctccgaagacgt                                  |
| RFP-R1                                | ctctagagtcgacctgcaggcatgcaagctttaagcgtagtttctgcgtttgc                         |
| P <sub>cysJH-rfp</sub> reconstruction |                                                                               |
| cl-F2                                 | agcttgcatgcctgcaggt                                                           |
| cl-R2                                 | gcctgggggtgcctaatgagtga                                                       |
| cysJ-F                                | gagttagctcactcattaggcaccagcggtgcgcaaaatcgctgatt                               |
| cysJH-R                               | gtaagcaaagctgtttctgcg                                                         |
| cysJH-F                               | tgacagggcgcagaaacagctttgcttaccggaaatcctggcgtcgttgat                           |
| cysH-R                                | ctagtatttctccttttcttagatgccttgctgatgcgac                                      |
| RFP-F1                                | tctagagaaaggagagaaatactagatggcttctccgaagacgt                                  |
| RFP-R1                                | ctctagagtcgacctgcaggcatgcaagctttaagcgtagtttctgcgtttgc                         |
| cl-JAR reconstruction                 |                                                                               |
| cl-JA-F                               | tctagagaaaggagagaaatactagatgcctgggttcattacgtaaaatgc                           |
| cysJ-R                                | ctagtatttctccttttcttagagtaagcaaagctgtttctgcg                                  |
| cysJ-F2                               | ataaaagaattagacattaattaaacccccgccctgacagggcgggggttttttgggtgcgcaaaatcgctgattta |

---

|                         |                                                                                |
|-------------------------|--------------------------------------------------------------------------------|
| cl-JA-R                 | ttaattaatgtctaattctttattttgc                                                   |
| RFP-F2                  | tctagagaaaggagagaaatactagatggcttctccgaagcgt                                    |
| RFP-R1                  | ctctagagtcgacctgcaggcatgcaagctttaagcgtagtttcgctgttgc                           |
| cl-F2                   | agcttgcctgcctgcaggt                                                            |
| cl-DAR reconstruction   |                                                                                |
| cysD-R                  | ctagtatttctcctcttctctagaatgttcgactataggagcgt                                   |
| cl-JA-F                 | tctagagaaaggagagaaatactagatgcctggttcattacgtaaaatgc                             |
| cl-JA-R                 | ttaattaatgtctaattctttattttgc                                                   |
| cysD-F2                 | attagacattaataaaaaaaaaaacccgccctgacagggcggggttttttcgggtgccttaagcacttttg        |
| RFP-F2                  | tctagagaaaggagagaaatactagatggcttctccgaagcgt                                    |
| RFP-R1                  | ctctagagtcgacctgcaggcatgcaagctttaagcgtagtttcgctgttgc                           |
| cl-F2                   | agcttgcctgcctgcaggt                                                            |
| cl-JHAR reconstruction  |                                                                                |
| cysH-R                  | ctagtatttctcctcttctctagatgccttgctgatgcgac                                      |
| cl-JA-F                 | tctagagaaaggagagaaatactagatgcctggttcattacgtaaaatgc                             |
| cl-JA-R                 | ttaattaatgtctaattctttattttgc                                                   |
| cysJ-F2                 | ataaaagaattagacattaataaaaaaaaaaacccgccctgacagggcggggttttttggcgcaaaatcgctgattta |
| cysH-R                  | ctagtatttctcctcttctctagatgccttgctgatgcgac                                      |
| RFP-F2                  | tctagagaaaggagagaaatactagatggcttctccgaagcgt                                    |
| RFP-R1                  | ctctagagtcgacctgcaggcatgcaagctttaagcgtagtttcgctgttgc                           |
| cl-F2                   | agcttgcctgcctgcaggt                                                            |
| cl-100AR reconstruction |                                                                                |
| 100AR-R                 | gagctagcactgtacctaggactgagctagccgtcaagcctggggtgcctaagagtga                     |
| 100AR-F                 | ggctagctcagtcctaggtacagtgtagctctagagaaaggagagaaatactag                         |
| cl-rhtA-R4              | ctaggactgagctagccgtcaaaaaaaaaaacccgccctgacagggcggggttttttttaattaatgtctaattc    |
| 100AR-F                 | ggctagctcagtcctaggtacagtgtagctctagagaaaggagagaaatactag                         |
| cl-101AR reconstruction |                                                                                |
| 101AR-R                 | gctagcataatacctaggactgagctagctgtaaagcctggggtgcctaagagtga                       |
| 101AR-F                 | agctagctcagtcctaggtattatgctagctctagagaaaggagagaaatactag                        |
| cl-rhtA-R5              | ctaggactgagctagctgtaaaaaaaaaaacccgccctgacagggcggggttttttttaattaatgtctaattc     |
| 101AR-F                 | agctagctcagtcctaggtattatgctagctctagagaaaggagagaaatactag                        |
| cl-109AR reconstruction |                                                                                |
| 109AR-R                 | gctagcacagtcctaggactgagctagctgtaaagcctggggtgcctaagagtga                        |
| 109AR-F                 | agctagctcagtcctaggactgtgctagctctagagaaaggagagaaatactag                         |

---

---

|                         |                                                                                 |
|-------------------------|---------------------------------------------------------------------------------|
| cl-rhtA-R6              | ctaggactgagctagctgtaaaaaaaaaaaccgccctgtcagggcgggggttttttttaattaatgtctaattc      |
| 109AR-F                 | agctagctcagtcctaggactgtgctagctctagagaaaggagagaaatactag                          |
| cl-105AR reconstruction |                                                                                 |
| 105AR-F                 | tcagtcctaggtactatgctagctctagagaaaggagagaaatactagatgcctgggttc                    |
| 105AR-R                 | gagctagcatagtagctaggactgagctagccgtaaagcctggggtgcctaatagtga                      |
| cl-rhtA-F               | atgcctgggttcattacgtaaaatgc                                                      |
| cl-rhtA-R2              | ctaggactgagctagccgtaaaaaaaaaaaccgccctgtcagggcgggggttttttttaattaatgtctaattc      |
| cl-rhtA-R3              | ctagtatttctccttttcttagagctagcatagtagctaggactgagctagccgta                        |
| RFP-F2                  | tctagagaaaggagagaaatactagatggcttctccgaagcgt                                     |
| cl-110AR reconstruction |                                                                                 |
| 110AR-F                 | ggctagctcagtcctaggtacaatgctagctctagagaaaggagagaaatactag                         |
| 110AR-F2                | tcagtcctaggtagcaatgctagctctagagaaaggagagaaatactagatgcctgggttc                   |
| cl-rhtA-F               | atgcctgggttcattacgtaaaatgc                                                      |
| 110AR-R                 | gctagcattgtacctaggactgagctagccgtaaagcctggggtgcctaatagtga                        |
| cl-rhtA-R2              | ctaggactgagctagccgtaaaaaaaaaaaccgccctgtcagggcgggggttttttttaattaatgtctaattc      |
| cl-116AR reconstruction |                                                                                 |
| cl-rhtA-F               | atgcctgggttcattacgtaaaatgc                                                      |
| 116AR-F                 | tcagtcctaggactatgctagctctagagaaaggagagaaatactagatgcctgggttc                     |
| 116AR-F2                | tgacagctagctcagtcctaggactatgctagctctagagaaaggagagaaatactag                      |
| 116AR-R                 | gagctagcatagtagctaggactgagctagctgtcaagcctggggtgcctaatagtga                      |
| cl-rhtA-R3              | agtcctaggactgagctagctgtcaaaaaaaaaaaccgccctgtcagggcgggggttttttttaattaatgtctaattc |
| 116AR-F2                | tgacagctagctcagtcctaggactatgctagctctagagaaaggagagaaatactag                      |
| cl-JB reconstruction    |                                                                                 |
| cl-F2                   | gcgctgtagcatcggcgaggcatgcgtgaagcttgcatgcctgcaggt                                |
| cl-rhtB-R               | tcacgcatgcctcgccgatgct                                                          |
| cl-JC reconstruction    |                                                                                 |
| cl-F3                   | tttggcattcatttgatttttcgcggtgaagcttgcatgcctgcaggtc                               |
| cl-rhtC-R               | tcaccgcgaaataatcaaatgaatgcc                                                     |

---

**Table S4.** Analysis of the initial sensing times and L-threonine concentrations of the three promoters in the L-threonine-producing strains.

|     | <b>Tm-P<sub>cysJ</sub></b> | <b>Tm-P<sub>cysD</sub></b> | <b>Tm-P<sub>cysJH</sub></b> |
|-----|----------------------------|----------------------------|-----------------------------|
| 3 h | 0.05 g/L                   | — —                        | 0.05 g/L                    |
| 5 h | — —                        | 0.25 g/L                   | — —                         |

1. Lerner, C.G. and Inouye, M. (1990) Low copy number plasmids for regulated low-level expression of cloned genes in *Escherichia coli* with blue/white insert screening capability. *Nucleic acids research* 18, 4631. 10.1093/nar/18.15.4631.
